# Supplementary material for: Mutagenic strategies against luxS gene affect the early stage of biofilm formation of Campylobacter jejuni
Source: Research Square preprint supplement (doi:10.21203/rs.3.rs-204944/v1), 2021-06-14
Supplement: Supplementary file 1 [file 944899c92f47b077b0ca9861.docx]

**Supplemental material**

**Mutagenic strategies against *luxS* gene affect the early stage of biofilm formation of *Campylobacter jejuni***

Martin Teren1*, Ekaterina Shagieva1, Lucie Vondrakova1, Jitka Viktorova1, Viviana Svarcova1, Katerina Demnerova1, Hana T. Michova1

1Department of Biochemistry and Microbiology, University of Chemistry and Technology, Prague, Czech Republic

**Corresponding author**

Martin Teren*

University of Chemistry and Technology, Technicka 5, 166 28, Prague, Czech Republic, E‑mail: [terenm@vscht.cz](mailto:terenm@vscht.cz) Phone number: +420721730644

**Supplemental Material and Methods**

All PCR programs were designed for Q5® High-Fidelity DNA Polymerase for PCR (both NEB, USA).

**Construction of the *luxS* deletion cassette**

**PCR cycle for primer Set 1**

| **Degrees of Celsius (°C)** | **Time (s)** | **Number of cycles** |
| --- | --- | --- |
| 98 | 30 |  |
| 98 | 10 | 30 |
| 52 | 30 |
| 72 | 20 |
| 72 | 20 |  |
| 4 | to open |  |

**PCR cycle for primer Set 2**

| **Degrees of Celsius (°C)** | **Time (s)** | **Number of cycles** |
| --- | --- | --- |
| 98 | 30 |  |
| 98 | 10 | 30 |
| 50 | 30 |
| 72 | 20 |
| 72 | 20 |  |
| 4 | to open |  |

**PCR cycle for primer Set 3 (chloramphenicol acetyltransferase (*cat*) cassette)**

| **Degrees of Celsius (°C)** | **Time (s)** | **Number of cycles** |
| --- | --- | --- |
| 98 | 30 |  |
| 98 | 10 | 30 |
| 63 | 30 |
| 72 | 30 |
| 72 | 30 |  |
| 4 | to open |  |

**
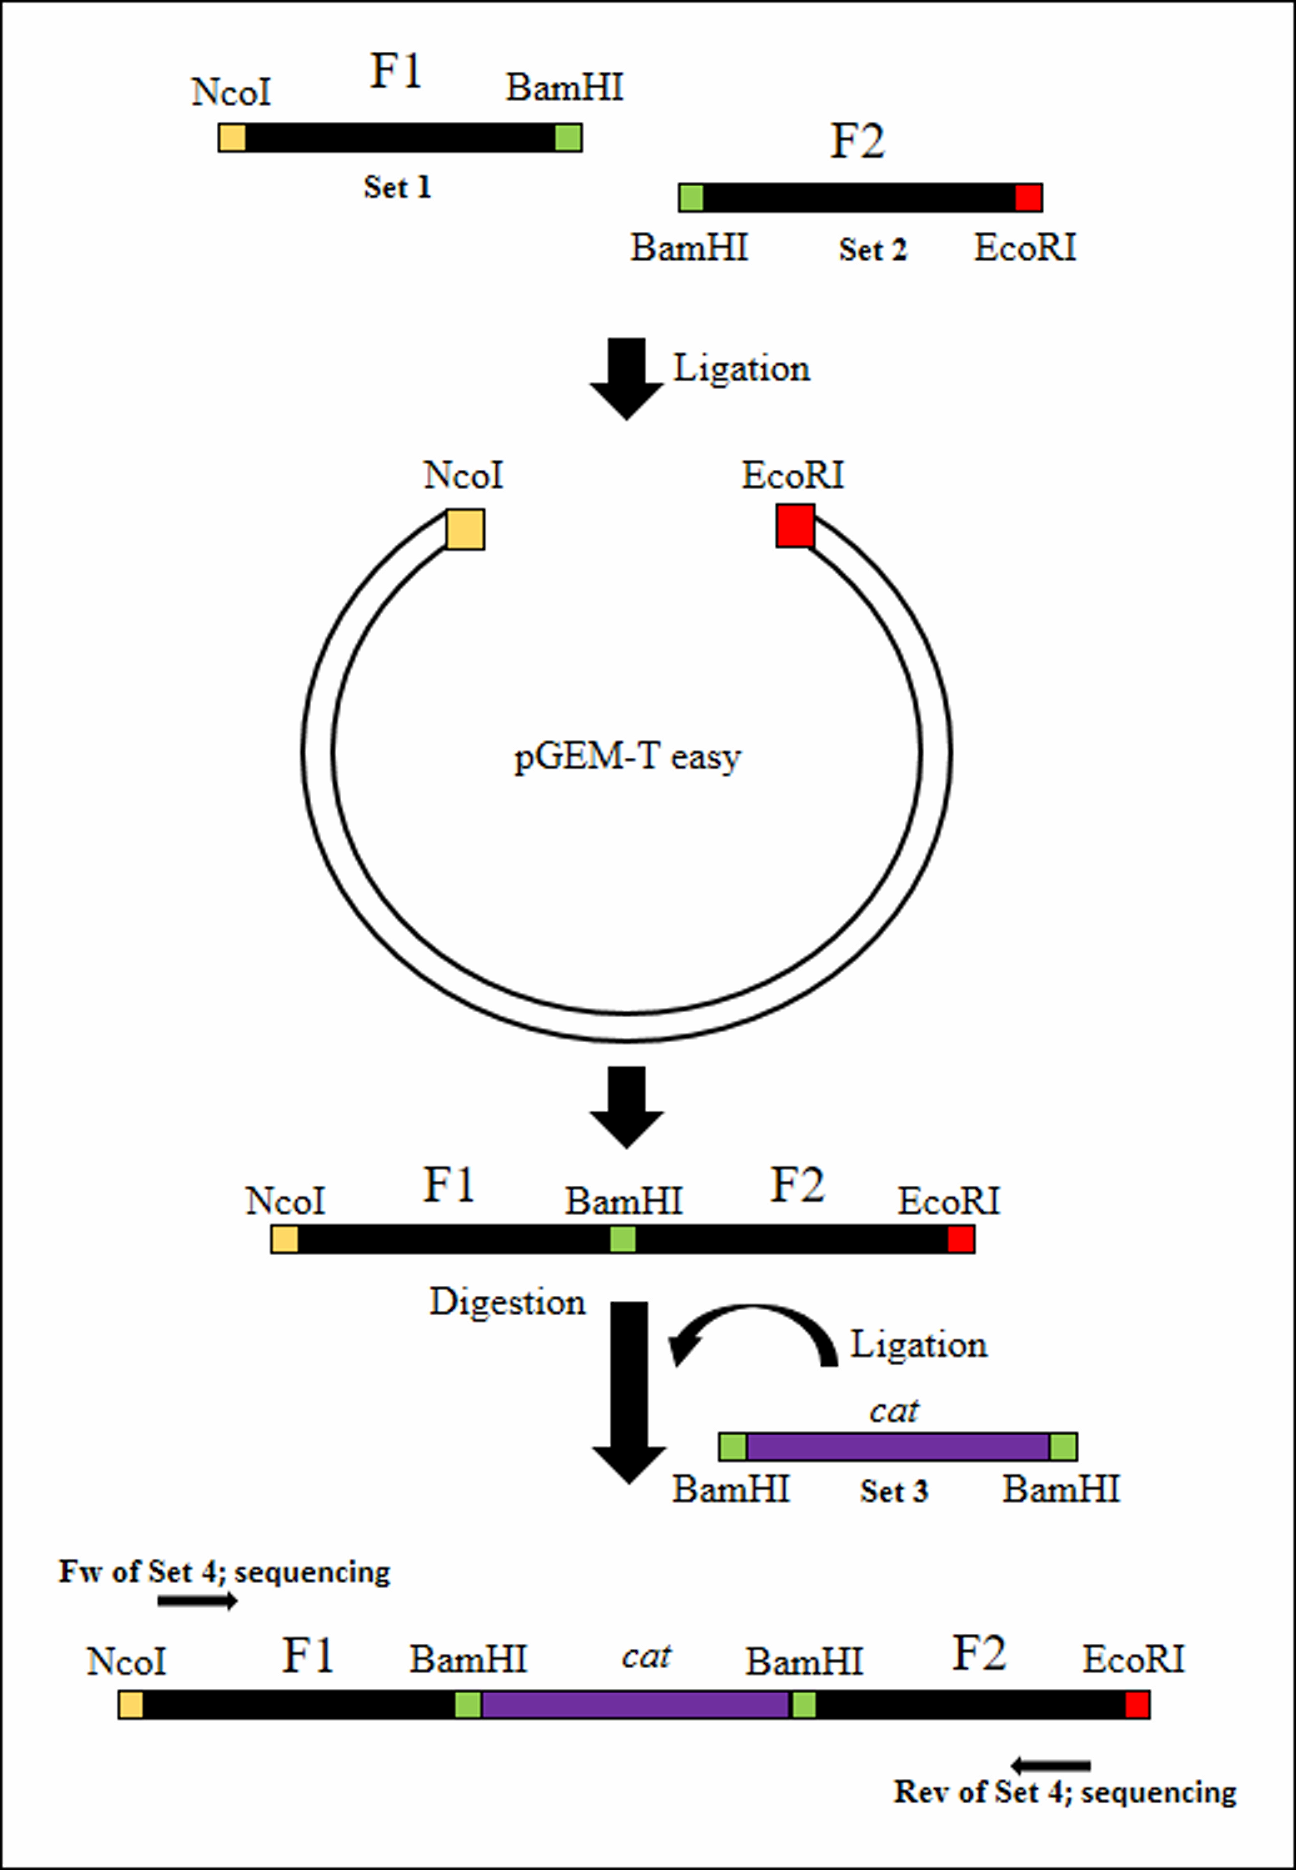
**

**Fig. S1a** The construction of the *luxS* deletion cassette was performed via PCR amplification of two fragments located in front of (F1; amplified with primer Set1) and behind (F2; amplified with primer Set2) the *luxS* gene. These complementary regions ensured the homologous recombination. Both fragments were digested, purified and cloned into the pGEM-T easy vector creating a unique BamHI restriction site between cloned fragments, which was used for insertion of the *cat* cassette pre-amplified with primer Set3. The final assembly of the plasmid was verified by Sanger sequencing with primer Set4.


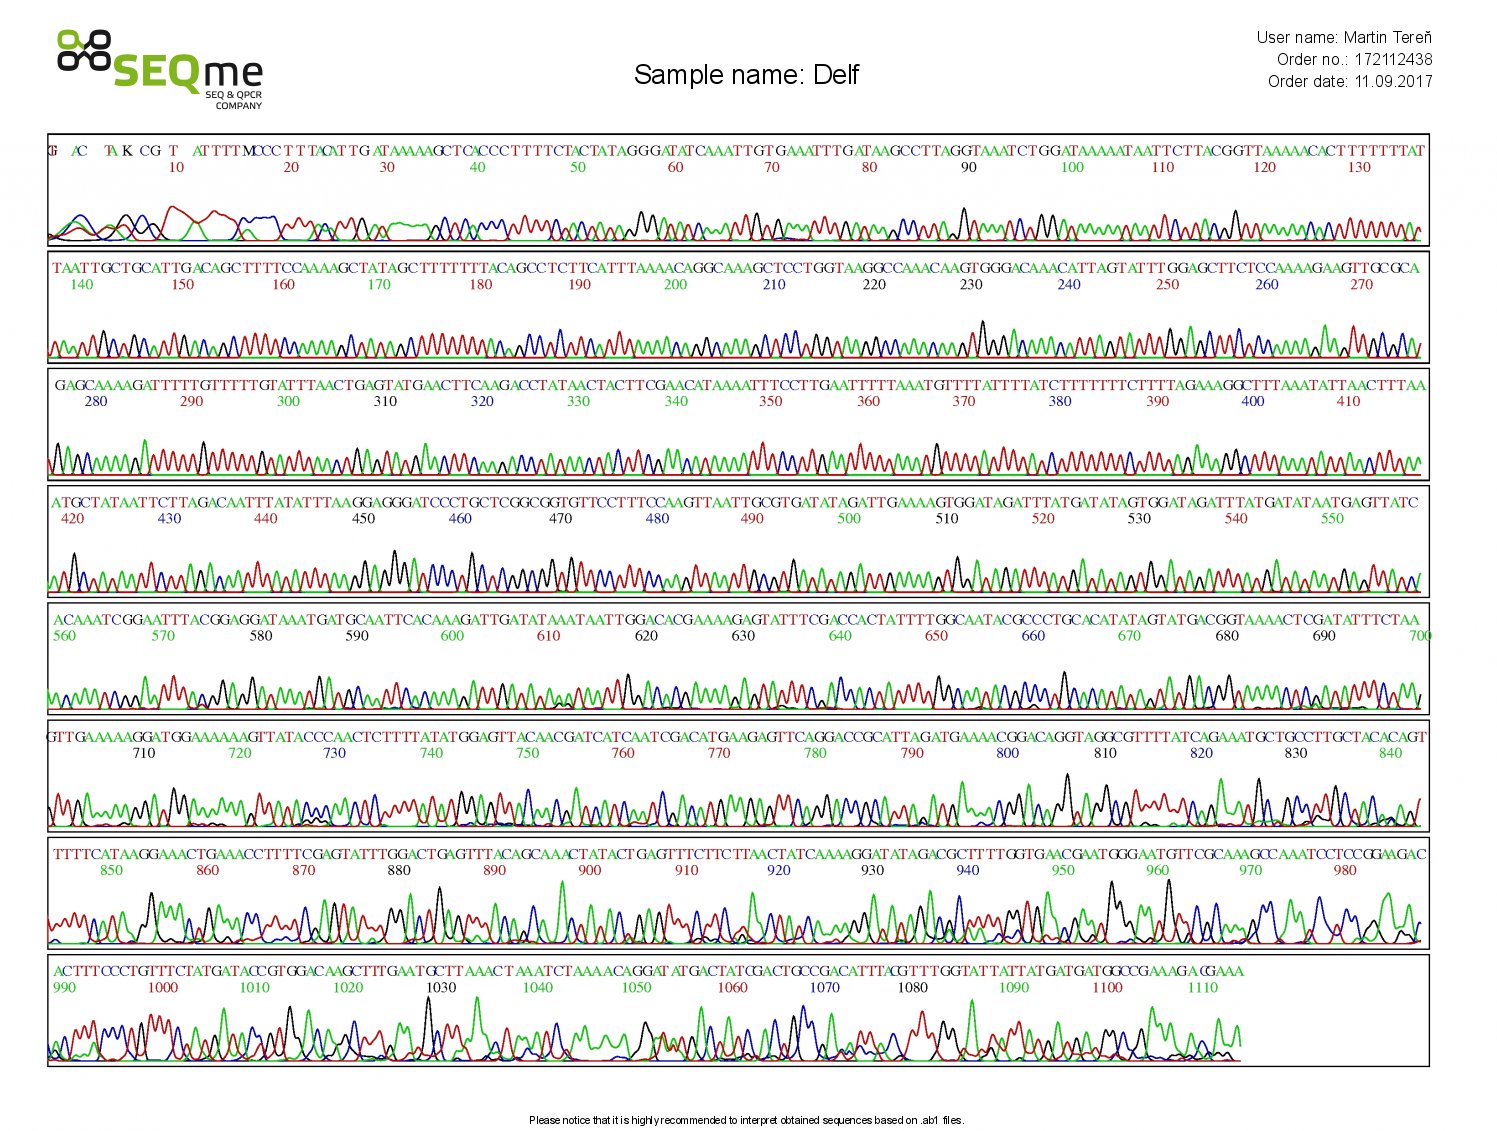
 **Fig. S1b** Results of Sanger sequencing of *luxS* deletion cassette with primer Set4-forward.

Fasta:

>GTACTAKCGTATTTTMCCCTTTACATTGATAAAAAGCTCACCCTTTTCTACTATAGGGATATCAAATTGTGAAATTTGATAAGCCTTAGGTAAATCTGGATAAAAATAATTCTTACGGTTAAAAACACTTTTTTTATTAATTGCTGCATTGACAGCTTTTCCAAAAGCTATAGCTTTTTTTACAGCCTCTTCATTTAAAACAGGCAAAGCTCCTGGTAAGGCCAAACAAGTGGGACAAACATTAGTATTTGGAGCTTCTCCAAAAGAAGTTGCGCATGAGCAAAAGATTTTTGTTTTTGTATTTAACTGAGTATGAACTTCAAGACCTATAACTACTTCGAACATAAAATTTCCTTGAATTTTTAAATGTTTTATTTTATCTTTTTTTCTTTTAGAAAGGCTTTAAATATTAACTTTAAATGCTATAATTCTTAGACAATTTATATTTAAGGAG**GGATCC**CTGCTCGGCGGTGTTCCTTTCCAAGTTAATTGCGTGATATAGATTGAAAAGTGGATAGATTTATGATATAGTGGATAGATTTATGATATAATGAGTTATCAACAAATCGGAATTTACGGAGGATAAATGATGCAATTCACAAAGATTGATATAAATAATTGGACACGAAAAGAGTATTTCGACCACTATTTTGGCAATACGCCCTGCACATATAGTATGACGGTAAAACTCGATATTTCTAAGTTGAAAAAGGATGGAAAAAAGTTATACCCAACTCTTTTATATGGAGTTACAACGATCATCAATCGACATGAAGAGTTCAGGACCGCATTAGATGAAAACGGACAGGTAGGCGTTTTATCAGAAATGCTGCCTTGCTACACAGTTTTTCATAAGGAAACTGAAACCTTTTCGAGTATTTGGACTGAGTTTACAGCAAACTATACTGAGTTTCTTCTTAACTATCAAAAGGATATAGACGCTTTTGGTGAACGAATGGGAATGTTCGCAAAGCCAAATCCTCCGGAAGACACTTTCCCTGTTTCTATGATACCGTGGACAAGCTTTGAATGCTTAAACTAAATCTAAAACAGGATATGACTATCGACTGCCGACATTTACGTTTGGTATTATTATGATGATGGCCGAAAGACGAAA


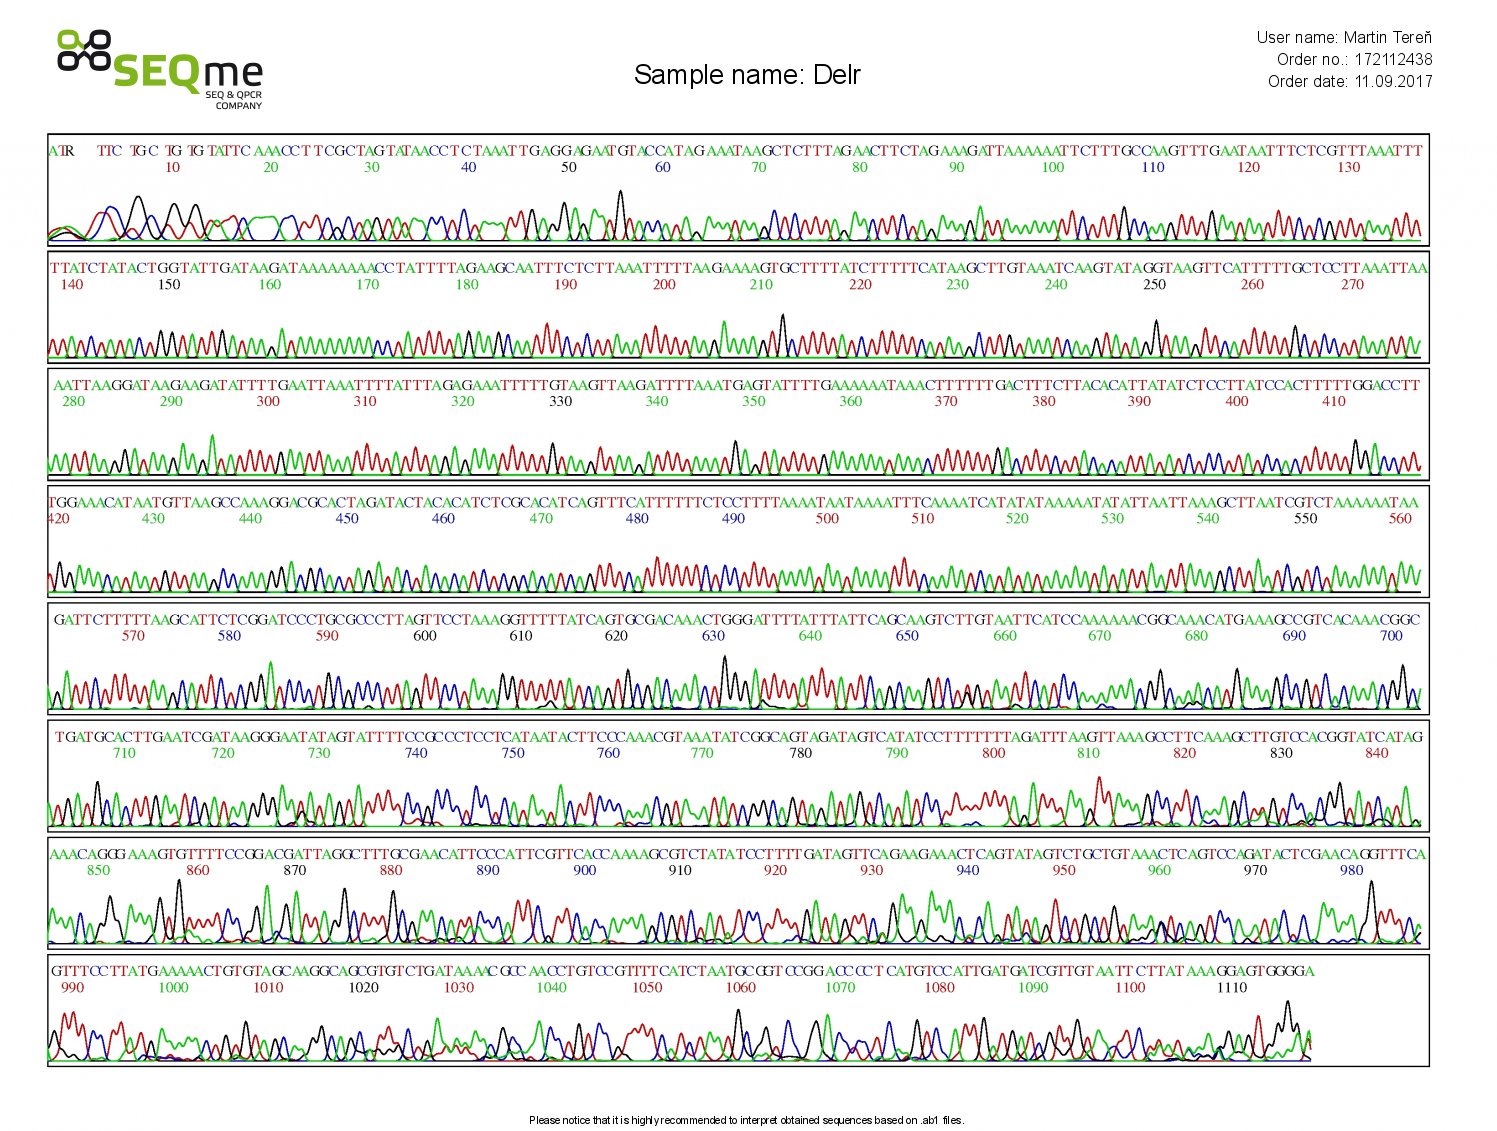
 **Fig. S1c** Results of Sanger sequencing of *luxS* deletion cassette with primer Set4-reverse transformed into the reverse complementary sequence.

Fasta:

>TCCCCACTCCTTTATAAGAATTACAACGATCATCAATGGACATGAGGGGTCCGGACCGCATTAGATGAAAACGGACAGGTTGGCGTTTTATCAGACACGCTGCCTTGCTACACAGTTTTTCATAAGGAAACTGAAACCTGTTCGAGTATCTGGACTGAGTTTACAGCAGACTATACTGAGTTTCTTCTGAACTATCAAAAGGATATAGACGCTTTTGGTGAACGAATGGGAATGTTCGCAAAGCCTAATCGTCCGGAAAACACTTTCCCTGTTTCTATGATACCGTGGACAAGCTTTGAAGGCTTTAACTTAAATCTAAAAAAAGGATATGACTATCTACTGCCGATATTTACGTTTGGGAAGTATTATGAGGAGGGCGGAAAATACTATATTCCCTTATCGATTCAAGTGCATCATGCCGTTTGTGACGGCTTTCATGTTTGCCGTTTTTTGGATGAATTACAAGACTTGCTGAATAAATAAAATCCCAGTTTGTCGCACTGATAAAAACCTTTAGGAACTAAGGGCGCAG**GGATCC**GAGAATGCTTAAAAAGAATCTTTATTTTTTAGACGATTAAGCTTTAATTAATATATTTTTATATATGATTTTGAAATTTTATTATTTTAAAAGGAGAAAAAATGAAACTGATGTGCGAGATGTGTAGTATCTAGTGCGTCCTTTGGCTTAACATTATGTTTCCAAAGGTCCAAAAAGTGGATAAGGAGATATAATGTGTAAGAAAGTCAAAAAAGTTTATTTTTTCAAAATACTCATTTAAAATCTTAACTTACAAAAATTTCTCTAAATAAAATTTAATTCAAAATATCTTCTTATCCTTAATTTTAATTTAAGGAGCAAAAATGAACTTACCTATACTTGATTTACAAGCTTATGAAAAAGATAAAAGCACTTTTCTTAAAAATTTAAGAGAAATTGCTTCTAAAATAGGTTTTTTTTATCTTATCAATACCAGTATAGATAAAAATTTAAACGAGAAATTATTCAAACTTGGCAAAGAATTTTTTAATCTTTCTAGAAGTTCTAAAGAGCTTATTTCTAT

**Construction of the *luxS* substitution cassette**

**PCR cycle for primer Set 5**

| **Degrees of Celsius (°C)** | **Time (s)** | **Number of cycles** |
| --- | --- | --- |
| 98 | 30 |  |
| 98 | 10 | 30 |
| 59 | 30 |
| 72 | 45 |
| 72 | 45 |  |
| 4 | to open |  |

**PCR cycle for primer Set 6**

| **Degrees of Celsius (°C)** | **Time (s)** | **Number of cycles** |
| --- | --- | --- |
| 98 | 30 |  |
| 98 | 10 | 30 |
| 58 | 30 |
| 72 | 120 |
| 72 | 60 |  |
| 4 | to open |  |

**PCR cycle for primer Set 8**

| **Degrees of Celsius (°C)** | **Time (s)** | **Number of cycles** |
| --- | --- | --- |
| 98 | 30 |  |
| 98 | 10 | 30 |
| 50 | 30 |
| 72 | 30 |
| 72 | 30 |  |
| 4 | to open |  |

**
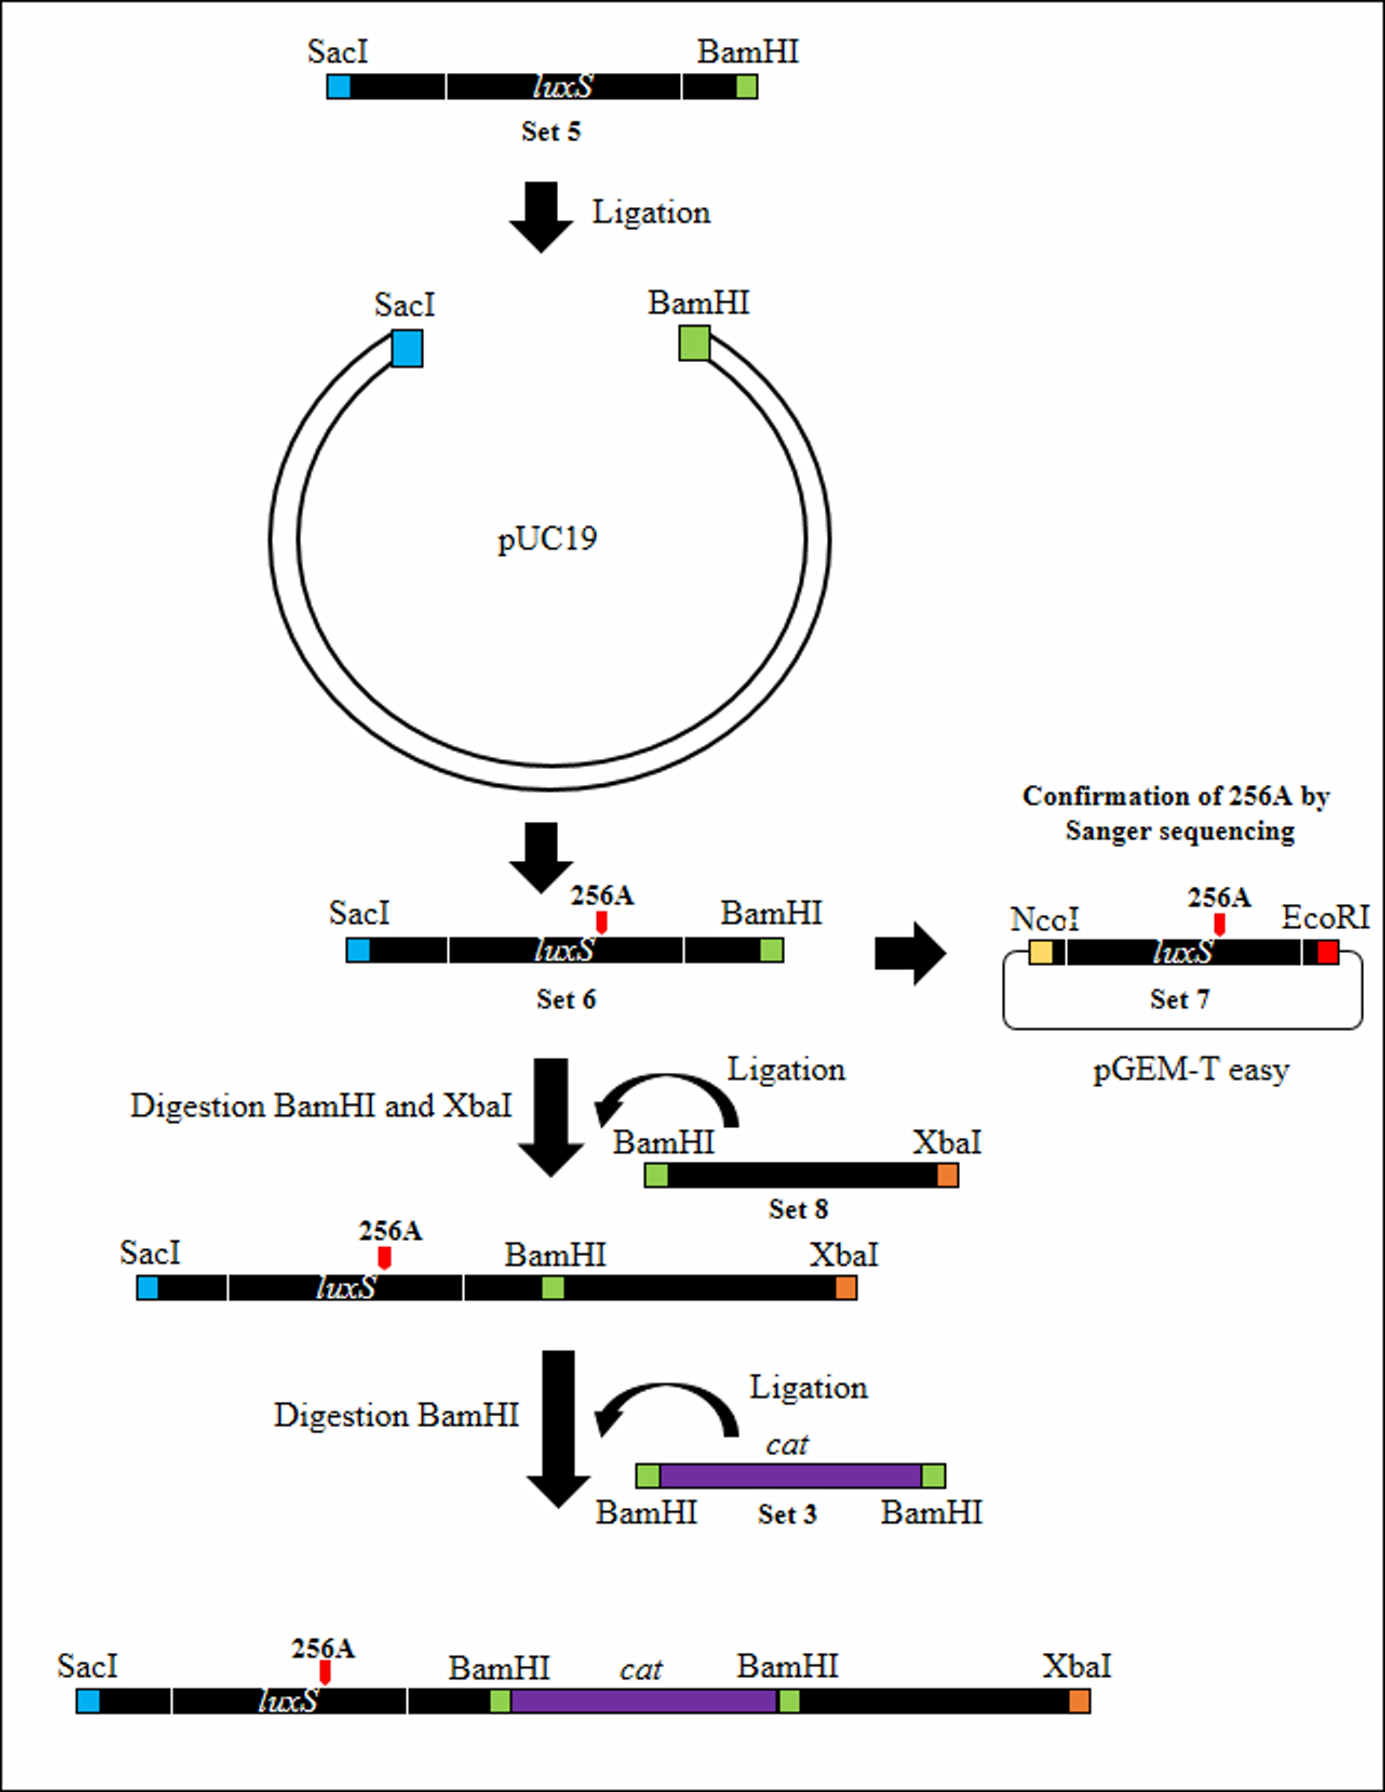
**

**Fig. S2a** The construction of the *luxS* substitution cassette was performed through the amplification of the fragment containing complete *luxS* encoding region with primer Set5. This fragment has been amplified with sufficient region in front of the *luxS* gene suitable for homologous recombination. The fragment was digested, purified and ligated into the pUC19 vector. Using the primer Set6, the point mutation 256A was incorporated into the *luxS* gene and confirmed by sequencing with the primer Set7. The fragment carrying the *luxS* gene was subsequently digested, purified and cloned to the pGEM-T easy vector. The second fragment located behind the *luxS* gene was amplified using the primer Set8, digested, purified, and cloned next to the first fragment. Finally, the *cat* cassette was ligated between both fragments into the BamHI restriction site.


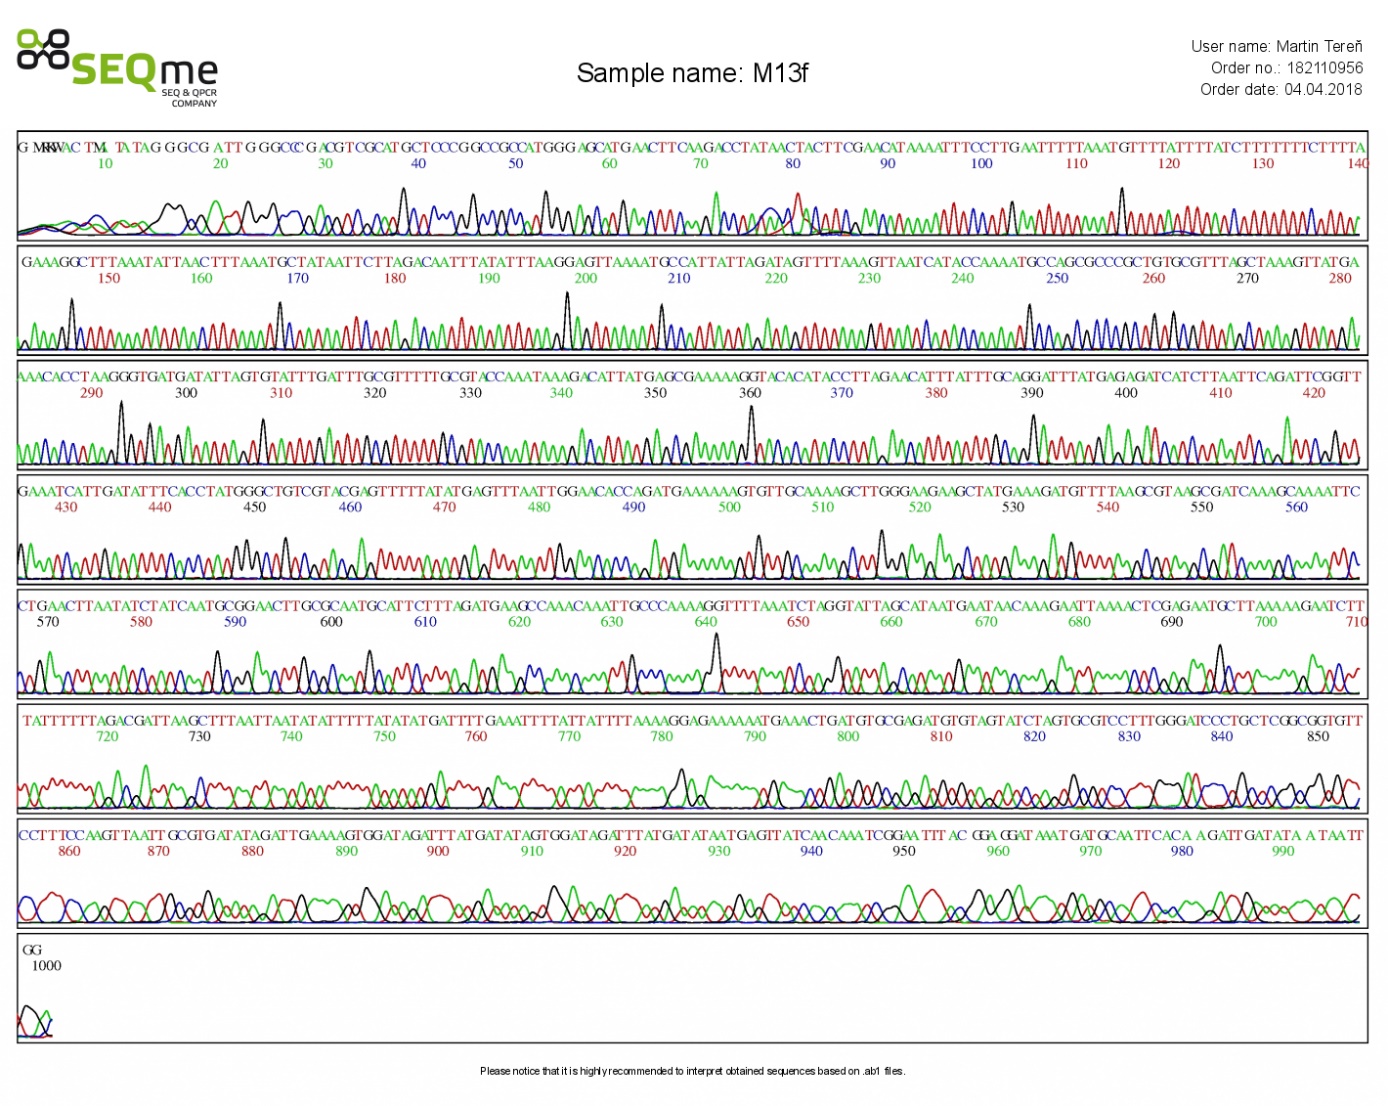
**Fig. S2b** Results of Sanger sequencing for confirmation of point mutation 256A within the *luxS* gene with using of commercially purchased primer M13; forward.

Fasta:

>GMRKWACTMATATAGGGCGATTGGGCCCGACGTCGCATGCTCCCGGCCGCCATGGGAGCATGAACTTCAAGACCTATAACTACTTCGAACATAAAATTTCCTTGAATTTTTAAATGTTTTATTTTATCTTTTTTTCTTTTAGAAAGGCTTTAAATATTAACTTTAAATGCTATAATTCTTAGACAATTTATATTTAAGGAGTTAAAATGCCATTATTAGATAGTTTTAAAGTTAATCATACCAAAATGCCAGCGCCCGCTGTGCGTTTAGCTAAAGTTATGAAAACACCTAAGGGTGATGATATTAGTGTATTTGATTTGCGTTTTTGCGTACCAAATAAAGACATTATGAGCGAAAAAGGTACACATACCTTAGAACATTTATTTGCAGGATTTATGAGAGATCATCTTAATTCAGATTCGGTTGAAATCATTGATATTTCACCTATGGGCTGTCGTACG**A**GTTTTTATATGAGTTTAATTGGAACACCAGATGAAAAAAGTGTTGCAAAAGCTTGGGAAGAAGCTATGAAAGATGTTTTAAGCGTAAGCGATCAAAGCAAAATTCCTGAACTTAATATCTATCAATGCGGAACTTGCGCAATGCATTCTTTAGATGAAGCCAAACAAATTGCCCAAAAGGTTTTAAATCTAGGTATTAGCATAATGAATAACAAAGAATTAAAACTCGAGAATGCTTAAAAAGAATCTTTATTTTTTAGACGATTAAGCTTTAATTAATATATTTTTATATATGATTTTGAAATTTTATTATTTTAAAAGGAGAAAAAATGAAACTGATGTGCGAGATGTGTAGTATCTAGTGCGTCCTTTGGGATCCCTGCTCGGCGGTGTTCCTTTCCAAGTTAATTGCGTGATATAGATTGAAAAGTGGATAGATTTATGATATAGTGGATAGATTTATGATATAATGAGTTATCAACAAATCGGAATTTACGGAGGATAAATGATGCAATTCACAAGATTGATATAATAATTGG

**Construction of the cassette for insertion inactivation of *luxS***

**PCR cycle for primer Set 9**

| **Degrees of Celsius (°C)** | **Time (s)** | **Number of cycles** |
| --- | --- | --- |
| 98 | 30 |  |
| 98 | 10 | 30 |
| 63 | 30 |
| 72 | 60 |
| 72 | 60 |  |
| 4 | to open |  |

**PCR cycle for primer Set 10**

| **Degrees of Celsius (°C)** | **Time (s)** | **Number of cycles** |
| --- | --- | --- |
| 98 | 30 |  |
| 98 | 10 | 30 |
| 56 | 30 |
| 72 | 150 |
| 72 | 60 |  |
| 4 | to open |  |

**
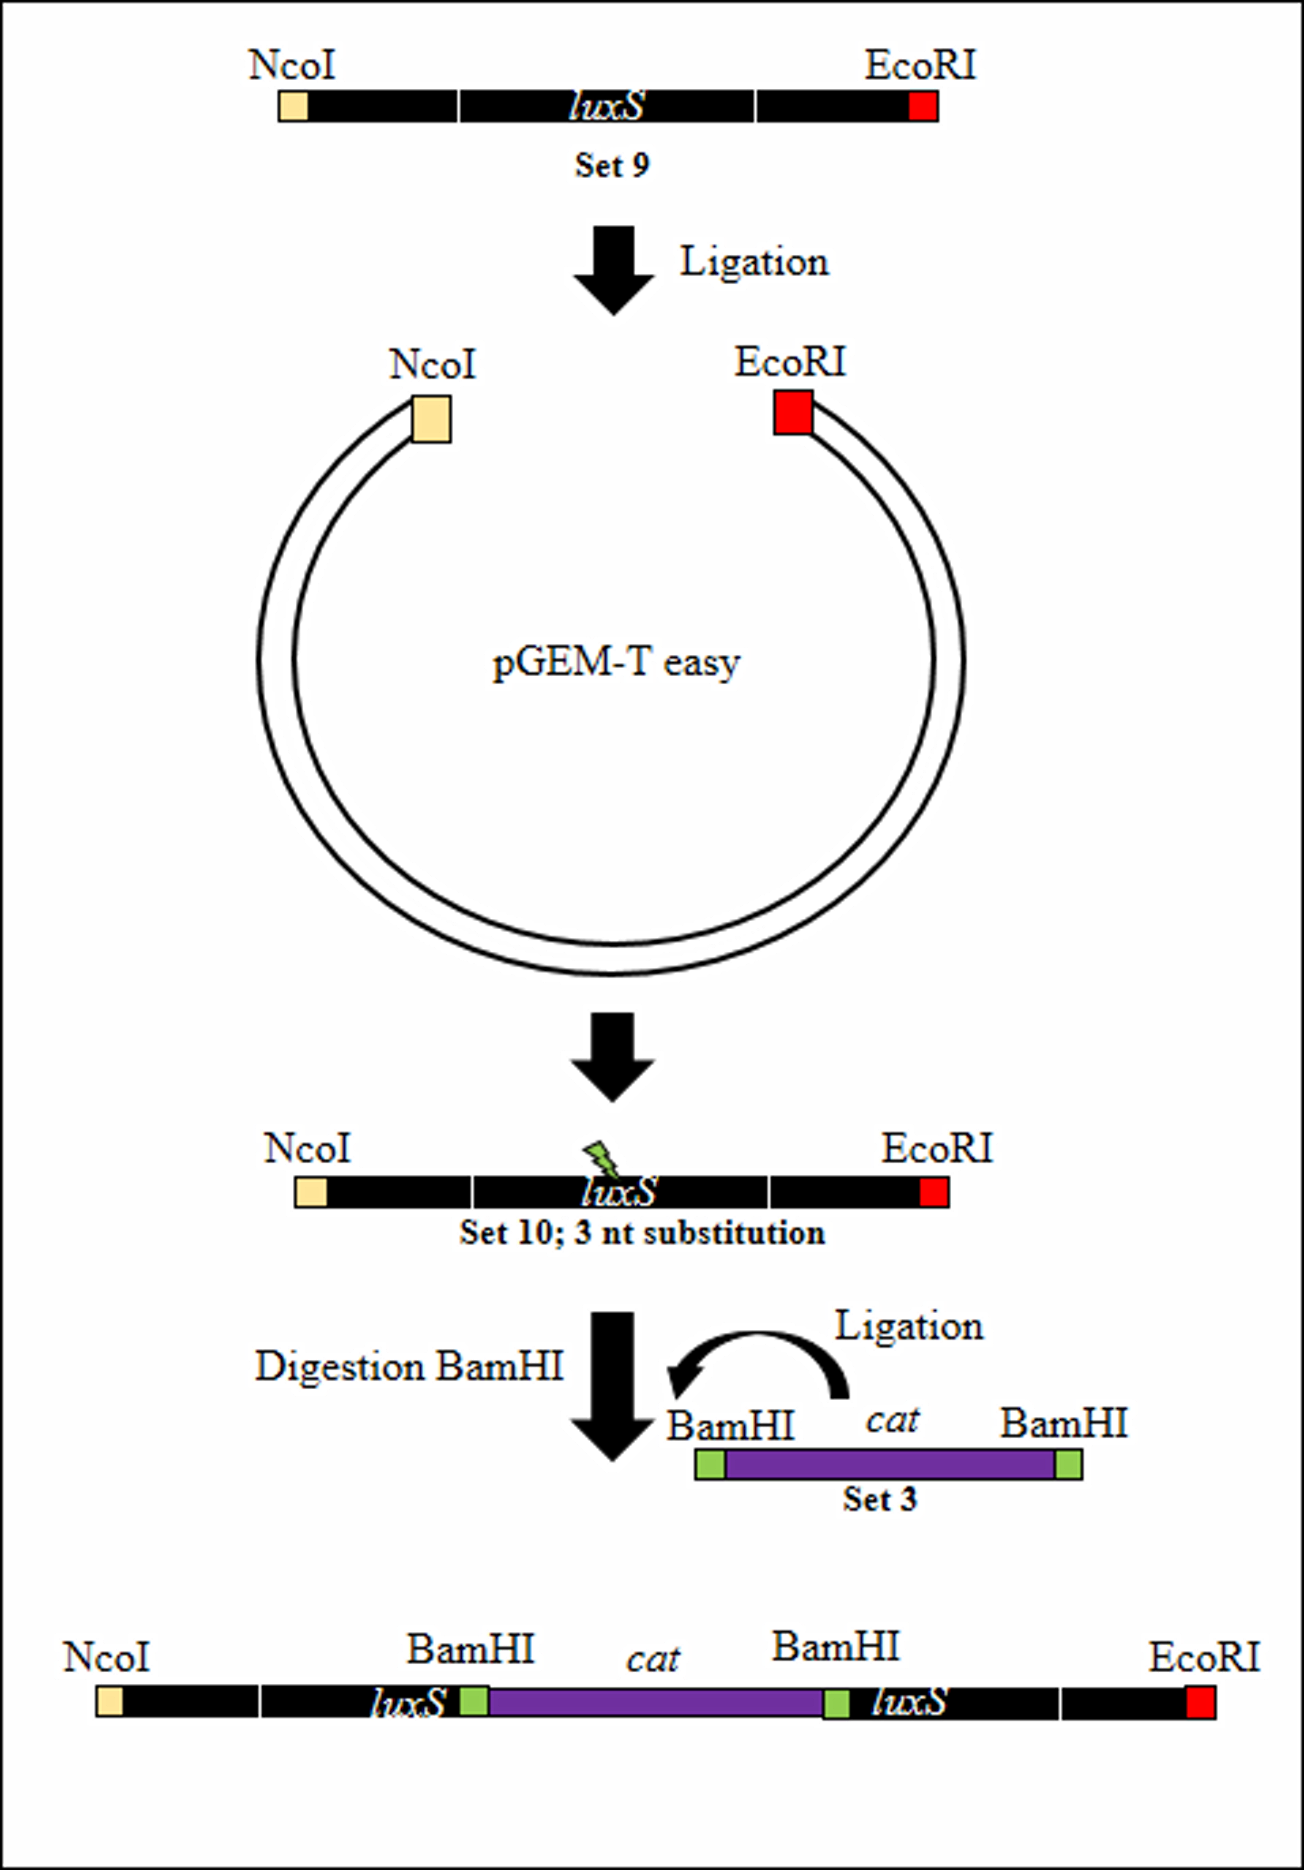
**

**Fig. S3a** The construction of *luxS* insertion inactivation cassette. Fragment containing the *luxS* gene and sufficient flanking regions for homologous recombination was amplified with primer Set9, digested, purified and cloned into the pGEM-T easy vector. Subsequent PCR with the primer Set10 led to replacing 3 nt in the middle of the *luxS* gene and formation of unique BamHI restriction site, where the *cat* cassette was cloned.
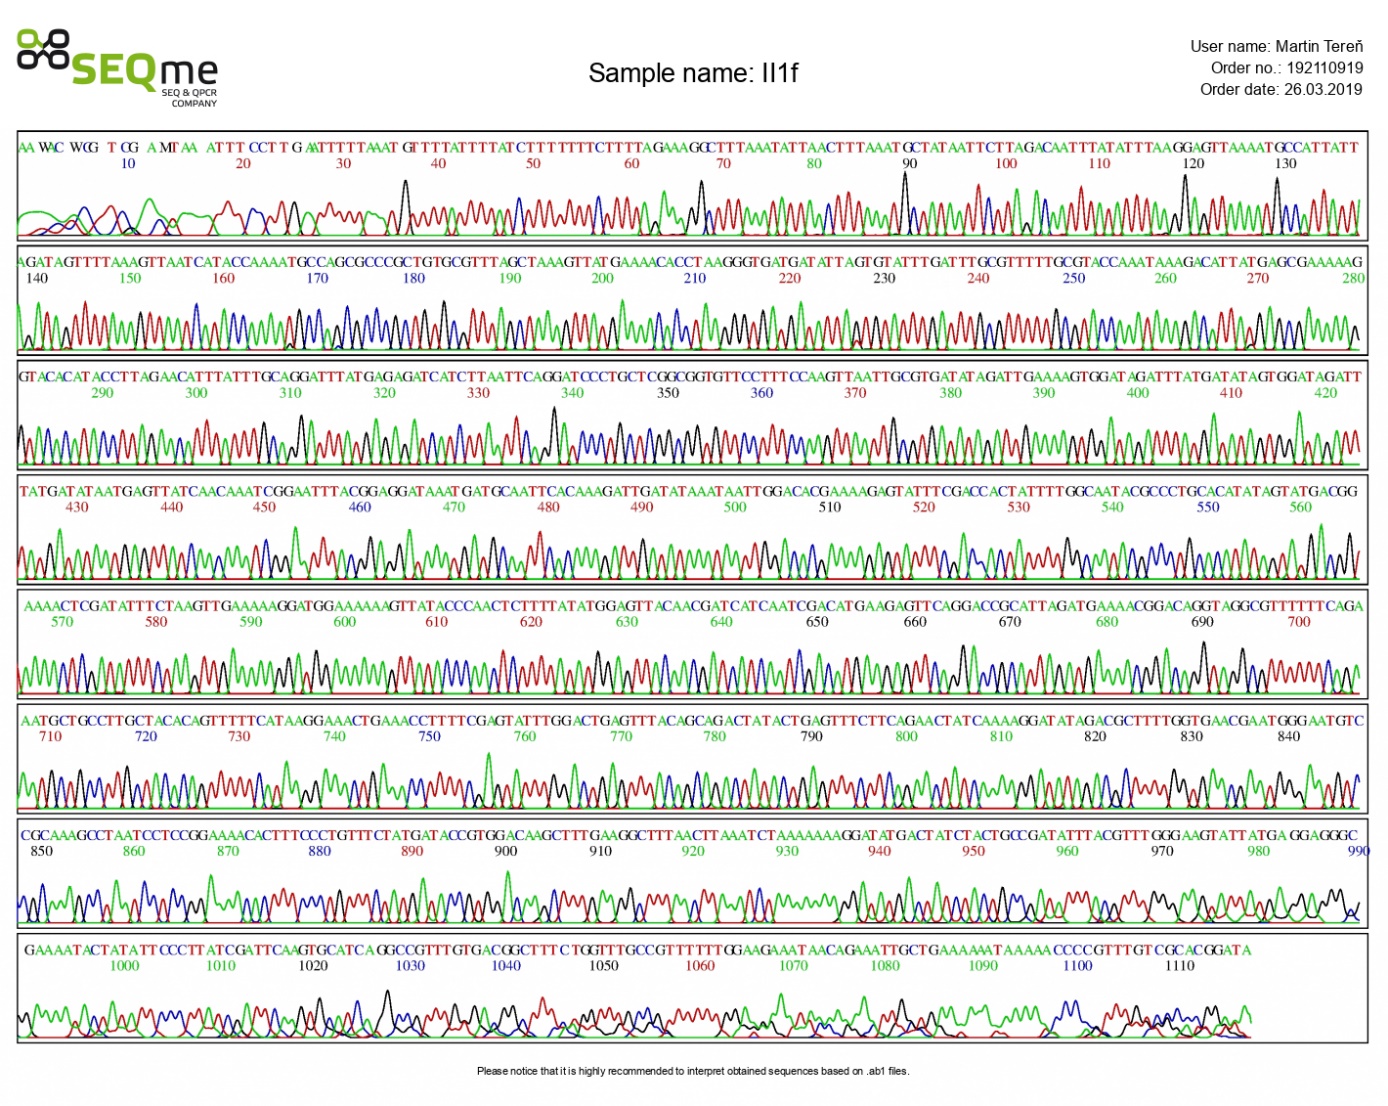
**Fig. S3b** Results of Sanger sequencing for *luxS* insertion inactivation cassette with using of primer SubF; forward

Fasta:

>AAWACWCGTCGAMTAAATTTCCTTGAATTTTTAAATGTTTTATTTTATCTTTTTTTCTTTTAGAAAGGCTTTAAATATTAACTTTAAATGCTATAATTCTTAGACAATTTATATTTAAGGAGTTAAAATGCCATTATTAGATAGTTTTAAAGTTAATCATACCAAAATGCCAGCGCCCGCTGTGCGTTTAGCTAAAGTTATGAAAACACCTAAGGGTGATGATATTAGTGTATTTGATTTGCGTTTTTGCGTACCAAATAAAGACATTATGAGCGAAAAAGGTACACATACCTTAGAACATTTATTTGCAGGATTTATGAGAGATCATCTTAATTCA**GGATCC**CTGCTCGGCGGTGTTCCTTTCCAAGTTAATTGCGTGATATAGATTGAAAAGTGGATAGATTTATGATATAGTGGATAGATTTATGATATAATGAGTTATCAACAAATCGGAATTTACGGAGGATAAATGATGCAATTCACAAAGATTGATATAAATAATTGGACACGAAAAGAGTATTTCGACCACTATTTTGGCAATACGCCCTGCACATATAGTATGACGGTAAAACTCGATATTTCTAAGTTGAAAAAGGATGGAAAAAAGTTATACCCAACTCTTTTATATGGAGTTACAACGATCATCAATCGACATGAAGAGTTCAGGACCGCATTAGATGAAAACGGACAGGTAGGCGTTTTTTCAGAAATGCTGCCTTGCTACACAGTTTTTCATAAGGAAACTGAAACCTTTTCGAGTATTTGGACTGAGTTTACAGCAGACTATACTGAGTTTCTTCAGAACTATCAAAAGGATATAGACGCTTTTGGTGAACGAATGGGAATGTCCGCAAAGCCTAATCCTCCGGAAAACACTTTCCCTGTTTCTATGATACCGTGGACAAGCTTTGAAGGCTTTAACTTAAATCTAAAAAAAGGATATGACTATCTACTGCCGATATTTACGTTTGGGAAGTATTATGAGGAGGGCGGAAAATACTATATTCCCTTATCGATTCAAGTGCATCAGGCCGTTTGTGACGGCTTTCTGGTTTGCCGTTTTTTGGAAGAAATAACAGAAATTGCTGAAAAAATAAAAACCCCGTTTGTCGCACGGATA


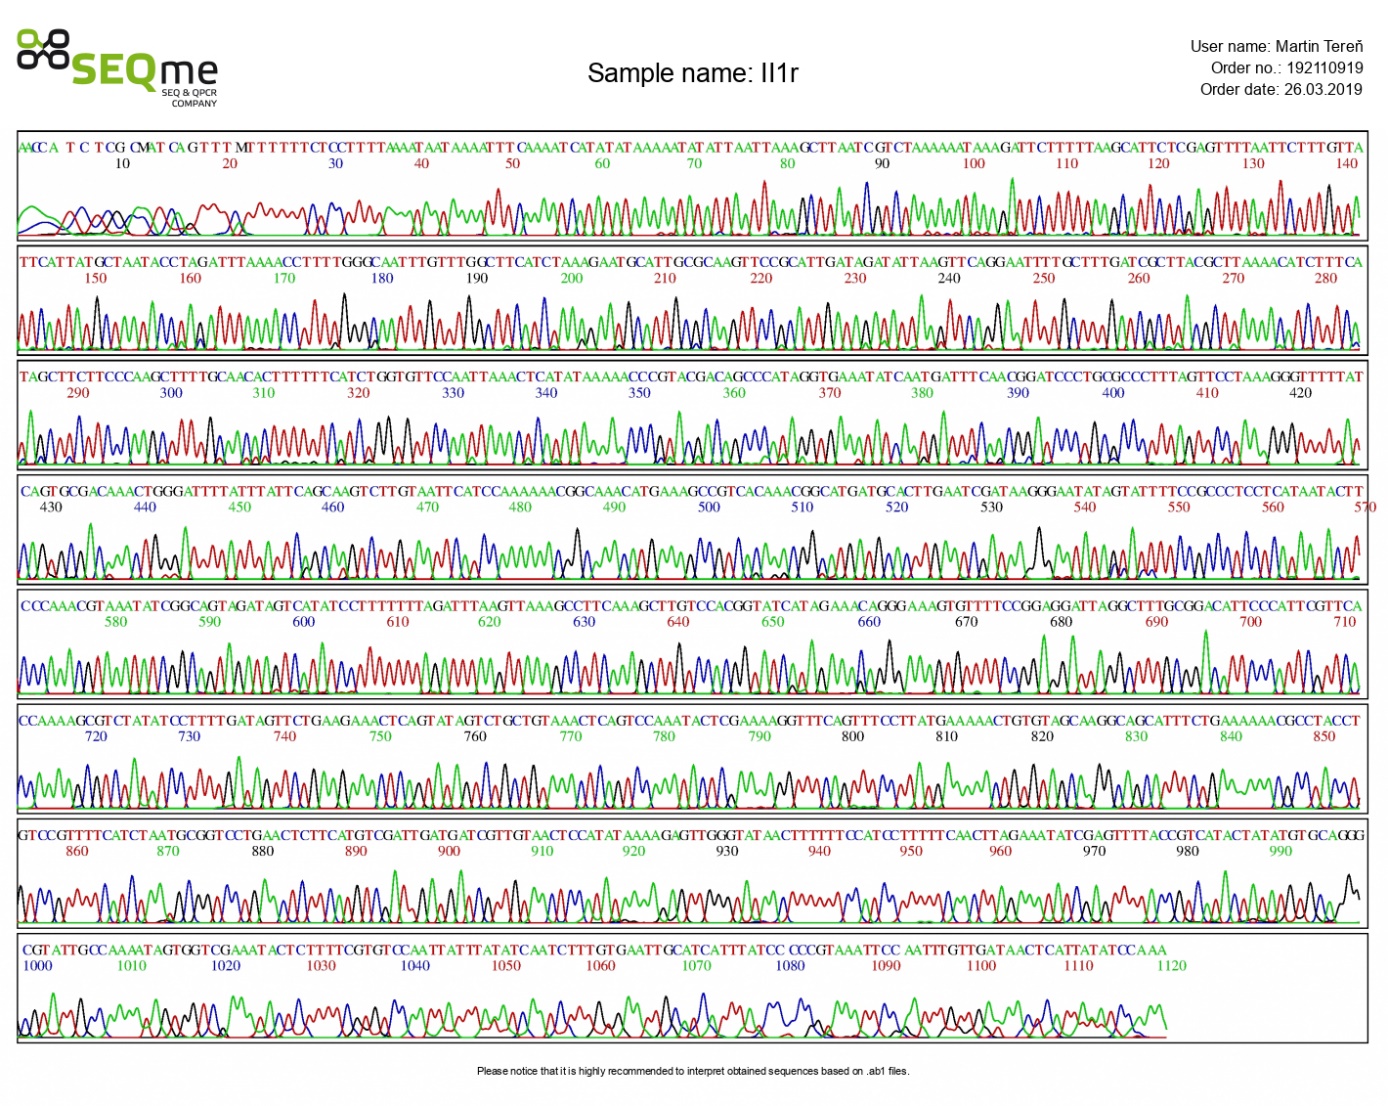
 **Fig. S3c** Results of Sanger sequencing for *luxS* insertion inactivation cassette with using of commercially purchased primer M13; reverse transformed into the reverse complementary sequence.

Fasta:

>TTTGGATATAATGAGTTATCAACAAATTGGAATTTACGGGGGATAAATGATGCAATTCACAAAGATTGATATAAATAATTGGACACGAAAAGAGTATTTCGACCACTATTTTGGCAATACGCCCTGCACATATAGTATGACGGTAAAACTCGATATTTCTAAGTTGAAAAAGGATGGAAAAAAGTTATACCCAACTCTTTTATATGGAGTTACAACGATCATCAATCGACATGAAGAGTTCAGGACCGCATTAGATGAAAACGGACAGGTAGGCGTTTTTTCAGAAATGCTGCCTTGCTACACAGTTTTTCATAAGGAAACTGAAACCTTTTCGAGTATTTGGACTGAGTTTACAGCAGACTATACTGAGTTTCTTCAGAACTATCAAAAGGATATAGACGCTTTTGGTGAACGAATGGGAATGTCCGCAAAGCCTAATCCTCCGGAAAACACTTTCCCTGTTTCTATGATACCGTGGACAAGCTTTGAAGGCTTTAACTTAAATCTAAAAAAAGGATATGACTATCTACTGCCGATATTTACGTTTGGGAAGTATTATGAGGAGGGCGGAAAATACTATATTCCCTTATCGATTCAAGTGCATCATGCCGTTTGTGACGGCTTTCATGTTTGCCGTTTTTTGGATGAATTACAAGACTTGCTGAATAAATAAAATCCCAGTTTGTCGCACTGATAAAAACCCTTTAGGAACTAAAGGGCGCAG**GGATCC**GTTGAAATCATTGATATTTCACCTATGGGCTGTCGTACGGGTTTTTATATGAGTTTAATTGGAACACCAGATGAAAAAAGTGTTGCAAAAGCTTGGGAAGAAGCTATGAAAGATGTTTTAAGCGTAAGCGATCAAAGCAAAATTCCTGAACTTAATATCTATCAATGCGGAACTTGCGCAATGCATTCTTTAGATGAAGCCAAACAAATTGCCCAAAAGGTTTTAAATCTAGGTATTAGCATAATGAATAACAAAGAATTAAAACTCGAGAATGCTTAAAAAGAATCTTTATTTTTTAGACGATTAAGCTTTAATTAATATATTTTTATATATGATTTTGAAATTTTATTATTTTAAAAGGAGAAAAAAAAACTGATGCGAGATGGTT

**Construction of complementation cassette**

**PCR cycle for primer Set 11**

| **Degrees of Celsius (°C)** | **Time (s)** | **Number of cycles** |
| --- | --- | --- |
| 98 | 30 |  |
| 98 | 10 | 30 |
| 58 | 30 |
| 72 | 45 |
| 72 | 30 |  |
| 4 | to open |  |

**PCR cycle for primer Set 12**

| **Degrees of Celsius (°C)** | **Time (s)** | **Number of cycles** |
| --- | --- | --- |
| 98 | 30 |  |
| 98 | 10 | 30 |
| 58 | 30 |
| 72 | 45 |
| 72 | 30 |  |
| 4 | to open |  |

**
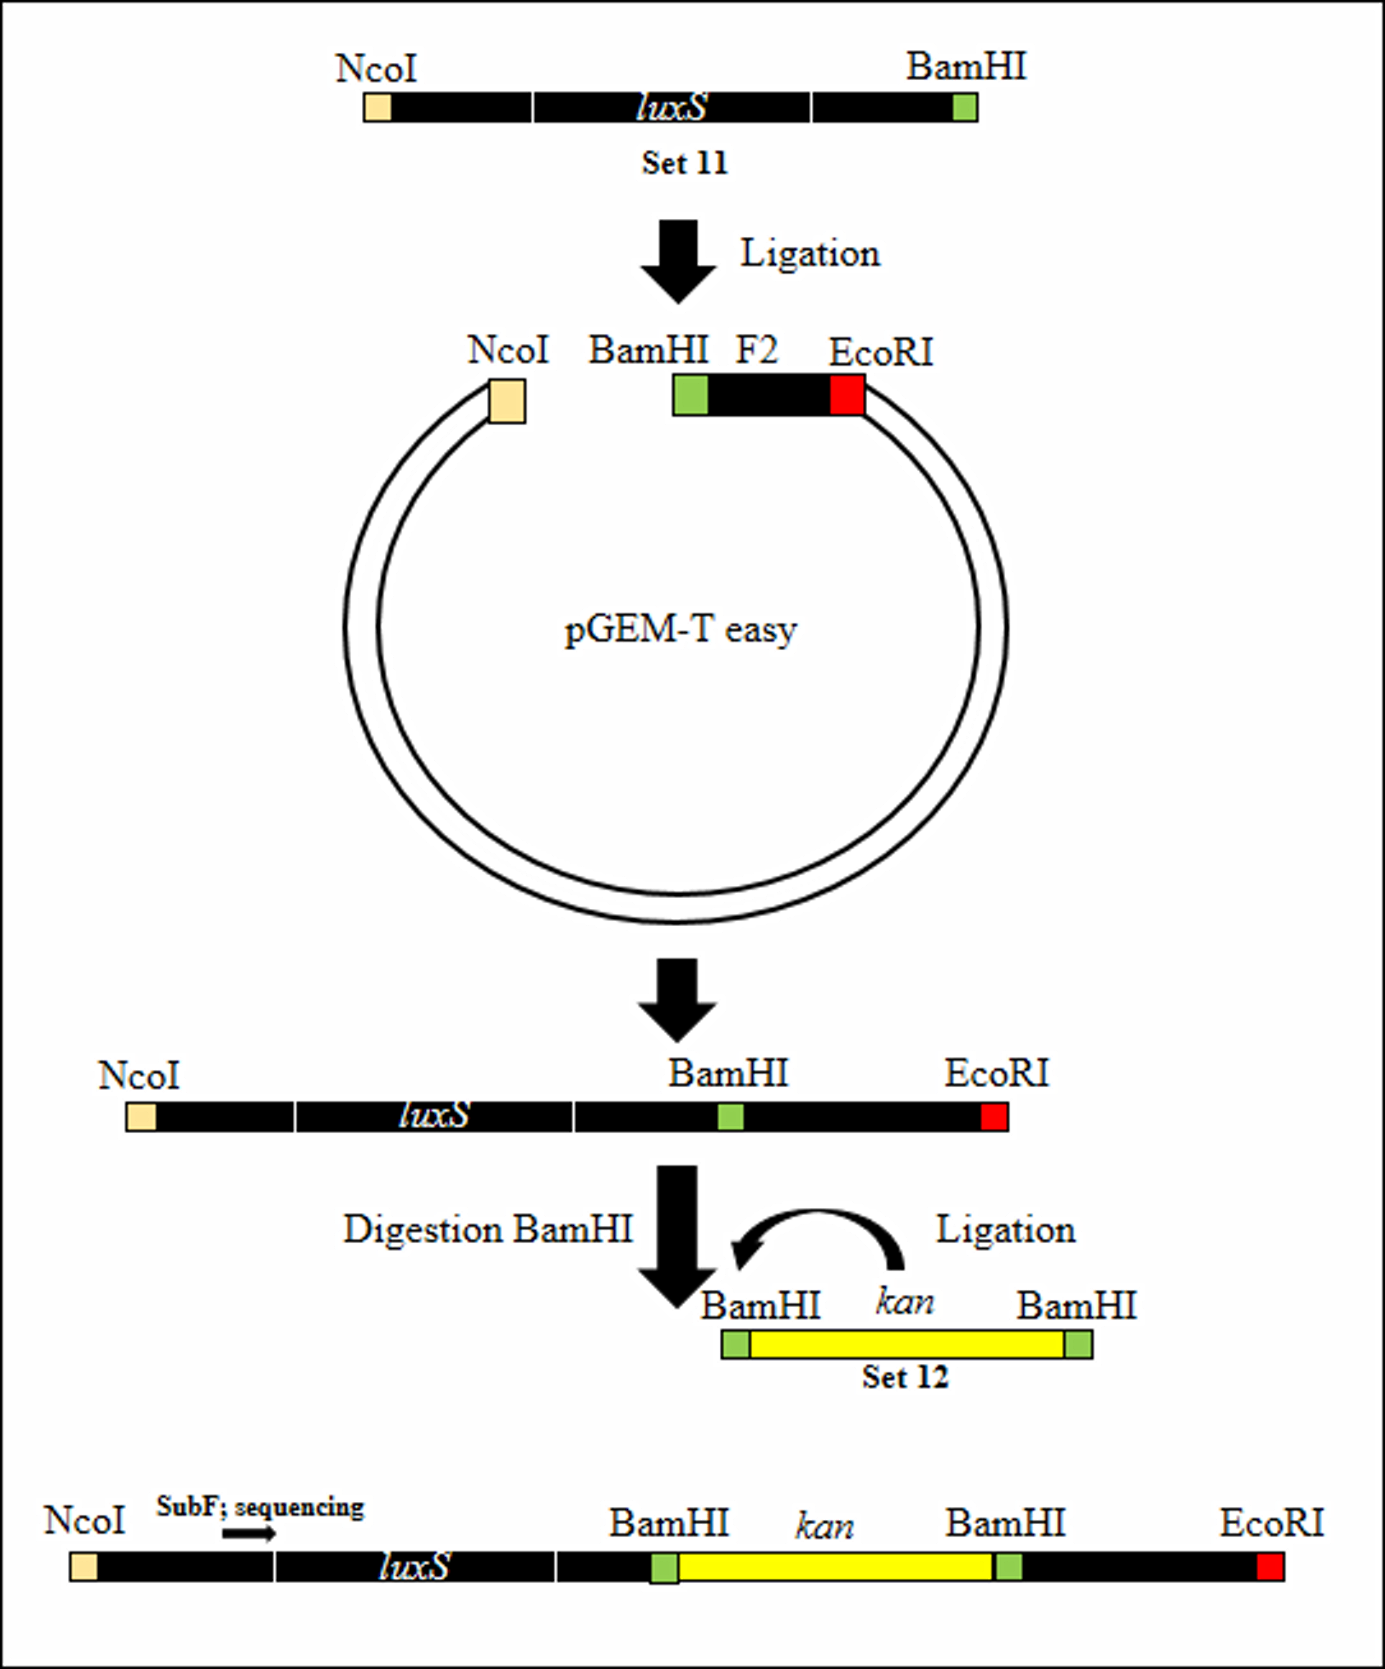
**

**Fig. S4a** The construction of the *luxS* complementation cassette. Fragment with the functional copy of the *luxS* gene as well as sufficient border region located in front of the gene was amplified with primer Set11, purified and digested with restriction enzymes NcoI and BamHI, same as the plasmid containing the complete deletion cassette (Online resource Fig S1a). The digested fragment and plasmid were electrophoretically separated in 1 % agarose gel. The bands representing the plasmid pGEM-T easy with the fragment F2 (Online Resource 1; Fig S4b; line 7) and the functional copy of the *luxS* gene (Online Resource 1; Fig S4b; line 4) were cut out, purified and ligated. Amplified *kan* cassette from the plasmid pRY107 (primer Set12) was cloned into the BamHI site.


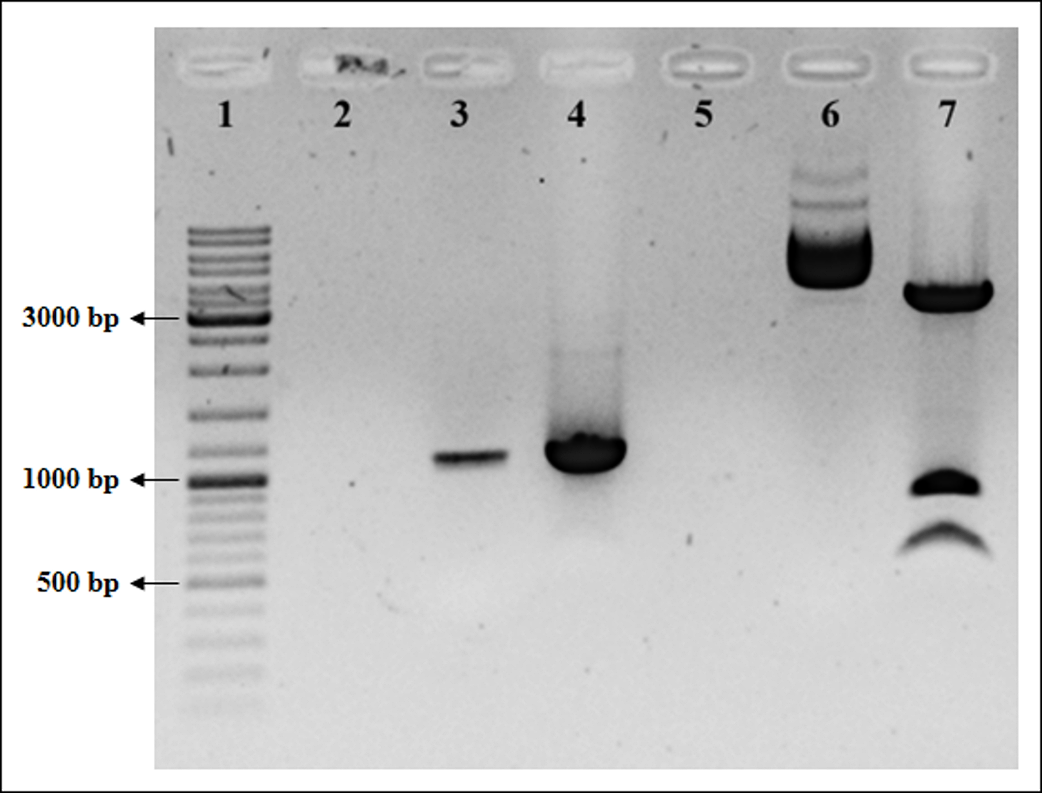


**Fig. S4b** The electropherogram of products of digestion with restriction enzymes NcoI and BamHI. Line 1 – GeneRuler DNA Ladder Mix (Thermo scientific, USA); Line 2 - empty; Line 3 – undigested fragment carrying the functional copy of the *luxS* gene; Line 4 – digested functional copy of the *luxS* gene; Line 5 - empty; Line 6 – undigested pGEM-T easy vector carrying the complete deletion cassette; Line 7 – digested plasmid separated to three bands representing the pGEM-T easy vector with fragment F2 (approx. 3000 bp), the *cat* cassette (approx, 800 bp), and the fragment F1 (approx. 600 bp).


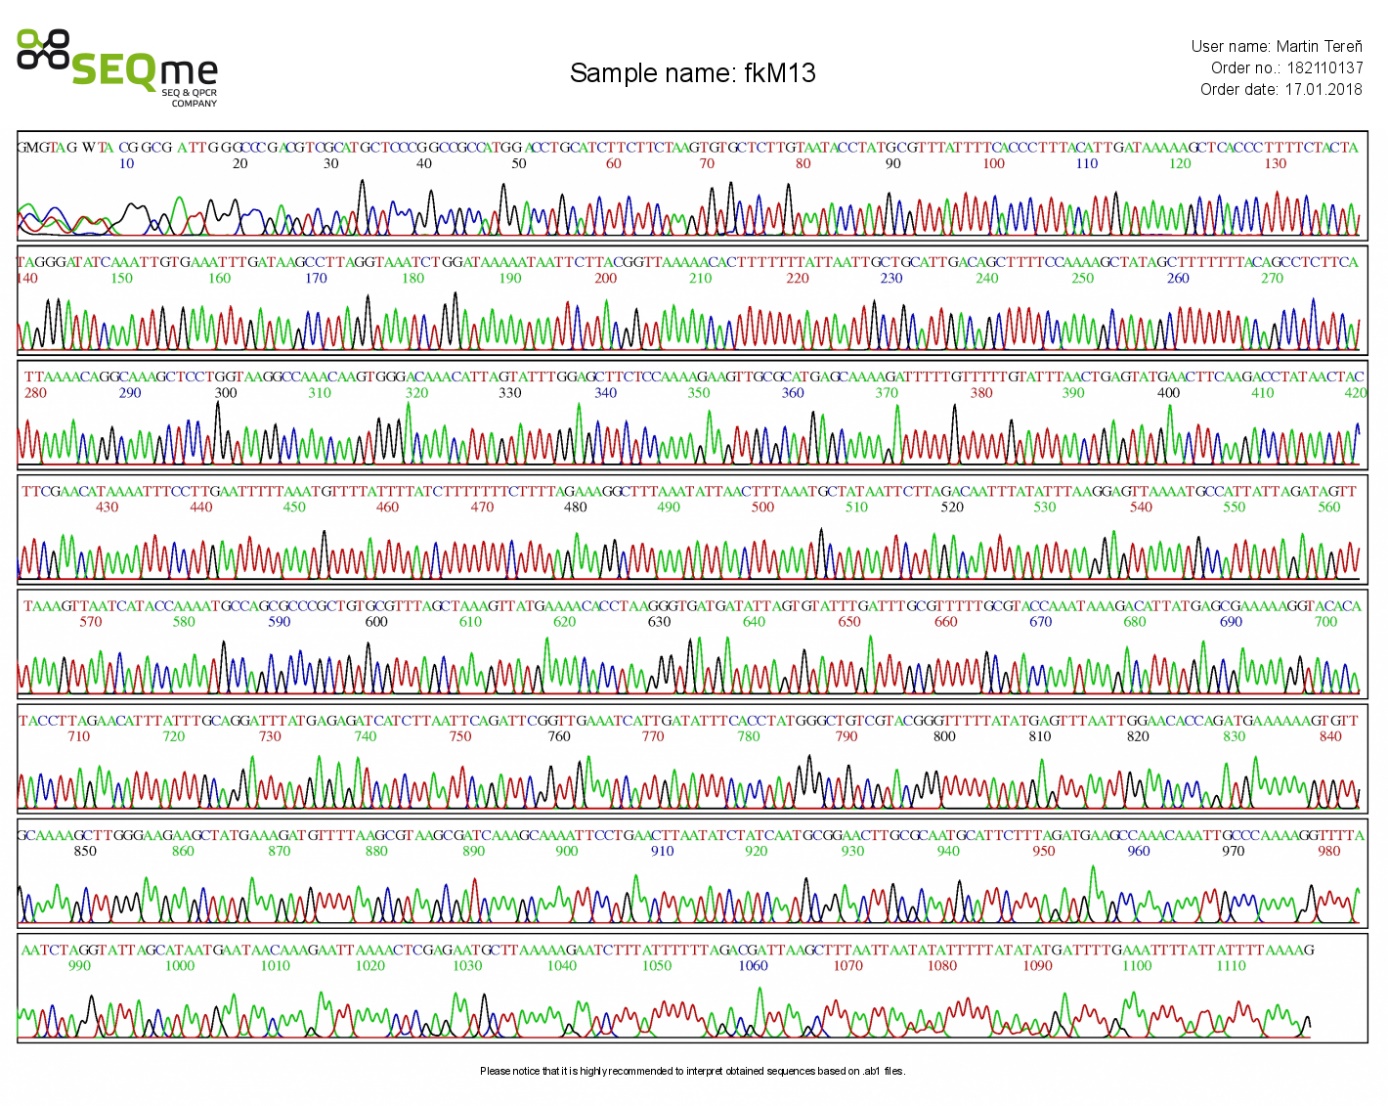
 **Fig. S4c** Results of Sanger sequencing for *luxS* complementation cassette with using of commercially purchased primer M13; forward.

Fasta:

>GMGTAGWTACGGCGATTGGGCCCGACGTCGCATGCTCCCGGCCGCCATGGACCTGCATCTTCTTCTAAGTGTGCTCTTGTAATACCTATGCGTTTATTTTCACCCTTTACATTGATAAAAAGCTCACCCTTTTCTACTATAGGGATATCAAATTGTGAAATTTGATAAGCCTTAGGTAAATCTGGATAAAAATAATTCTTACGGTTAAAAACACTTTTTTTATTAATTGCTGCATTGACAGCTTTTCCAAAAGCTATAGCTTTTTTTACAGCCTCTTCATTTAAAACAGGCAAAGCTCCTGGTAAGGCCAAACAAGTGGGACAAACATTAGTATTTGGAGCTTCTCCAAAAGAAGTTGCGCATGAGCAAAAGATTTTTGTTTTTGTATTTAACTGAGTATGAACTTCAAGACCTATAACTACTTCGAACATAAAATTTCCTTGAATTTTTAAATGTTTTATTTTATCTTTTTTTCTTTTAGAAAGGCTTTAAATATTAACTTTAAATGCTATAATTCTTAGACAATTTATATTTAAGGAGTTAAAATGCCATTATTAGATAGTTTTAAAGTTAATCATACCAAAATGCCAGCGCCCGCTGTGCGTTTAGCTAAAGTTATGAAAACACCTAAGGGTGATGATATTAGTGTATTTGATTTGCGTTTTTGCGTACCAAATAAAGACATTATGAGCGAAAAAGGTACACATACCTTAGAACATTTATTTGCAGGATTTATGAGAGATCATCTTAATTCAGATTCGGTTGAAATCATTGATATTTCACCTATGGGCTGTCGTACGGGTTTTTATATGAGTTTAATTGGAACACCAGATGAAAAAAGTGTTGCAAAAGCTTGGGAAGAAGCTATGAAAGATGTTTTAAGCGTAAGCGATCAAAGCAAAATTCCTGAACTTAATATCTATCAATGCGGAACTTGCGCAATGCATTCTTTAGATGAAGCCAAACAAATTGCCCAAAAGGTTTTAAATCTAGGTATTAGCATAATGAATAACAAAGAATTAAAACTCGAGAATGCTTAAAAAGAATCTTTATTTTTTAGACGATTAAGCTTTAATTAATATATTTTTATATATGATTTTGAAATTTTATTATTTTAAAAG


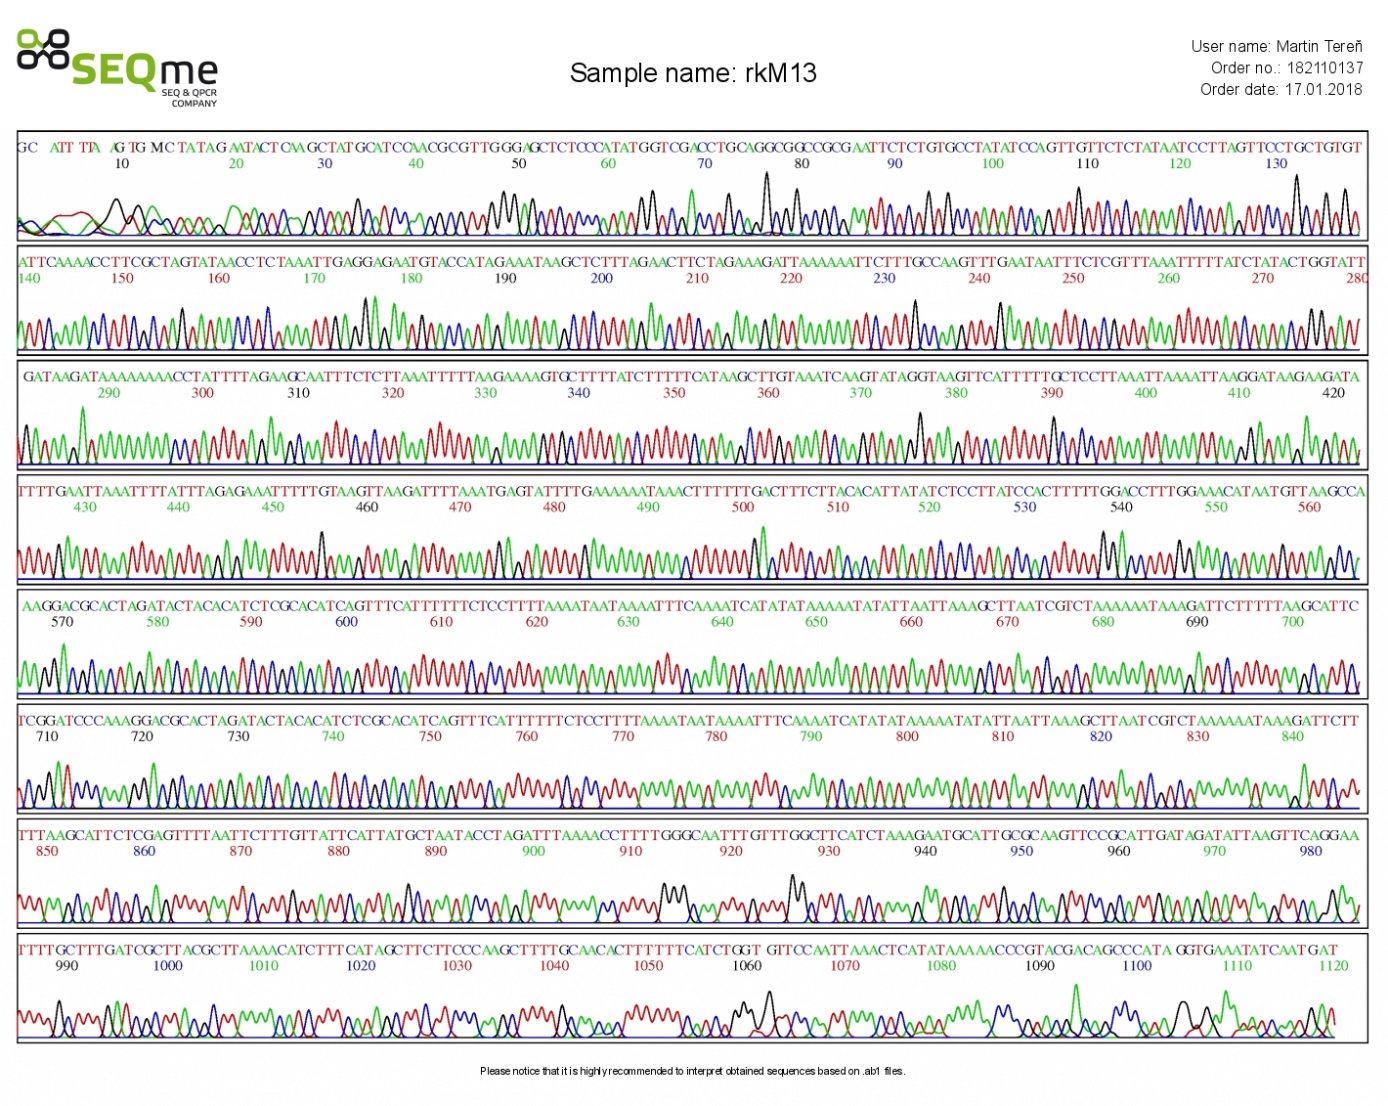
 **Fig. S4d** Results of Sanger sequencing for the *luxS* complementation cassette with using of commercially purchased primer M13; reverse transformed into the reverse complementary sequence.

Fasta:

>ATCATTGATATTTCACCTATGGGCTGTCGTACGGGTTTTTATATGAGTTTAATTGGAACACCAGATGAAAAAAGTGTTGCAAAAGCTTGGGAAGAAGCTATGAAAGATGTTTTAAGCGTAAGCGATCAAAGCAAAATTCCTGAACTTAATATCTATCAATGCGGAACTTGCGCAATGCATTCTTTAGATGAAGCCAAACAAATTGCCCAAAAGGTTTTAAATCTAGGTATTAGCATAATGAATAACAAAGAATTAAAACTCGAGAATGCTTAAAAAGAATCTTTATTTTTTAGACGATTAAGCTTTAATTAATATATTTTTATATATGATTTTGAAATTTTATTATTTTAAAAGGAGAAAAAATGAAACTGATGTGCGAGATGTGTAGTATCTAGTGCGTCCTTTG**GGATCC**GAGAATGCTTAAAAAGAATCTTTATTTTTTAGACGATTAAGCTTTAATTAATATATTTTTATATATGATTTTGAAATTTTATTATTTTAAAAGGAGAAAAAATGAAACTGATGTGCGAGATGTGTAGTATCTAGTGCGTCCTTTGGCTTAACATTATGTTTCCAAAGGTCCAAAAAGTGGATAAGGAGATATAATGTGTAAGAAAGTCAAAAAAGTTTATTTTTTCAAAATACTCATTTAAAATCTTAACTTACAAAAATTTCTCTAAATAAAATTTAATTCAAAATATCTTCTTATCCTTAATTTTAATTTAAGGAGCAAAAATGAACTTACCTATACTTGATTTACAAGCTTATGAAAAAGATAAAAGCACTTTTCTTAAAAATTTAAGAGAAATTGCTTCTAAAATAGGTTTTTTTTATCTTATCAATACCAGTATAGATAAAAATTTAAACGAGAAATTATTCAAACTTGGCAAAGAATTTTTTAATCTTTCTAGAAGTTCTAAAGAGCTTATTTCTATGGTACATTCTCCTCAATTTAGAGGTTATACTAGCGAAGGTTTTGAATACACAGCAGGAACTAAGGATTATAGAGAACAACTGGATATAGGCACAGAGAATTCGCGGCCGCCTGCAGGTCGACCATA


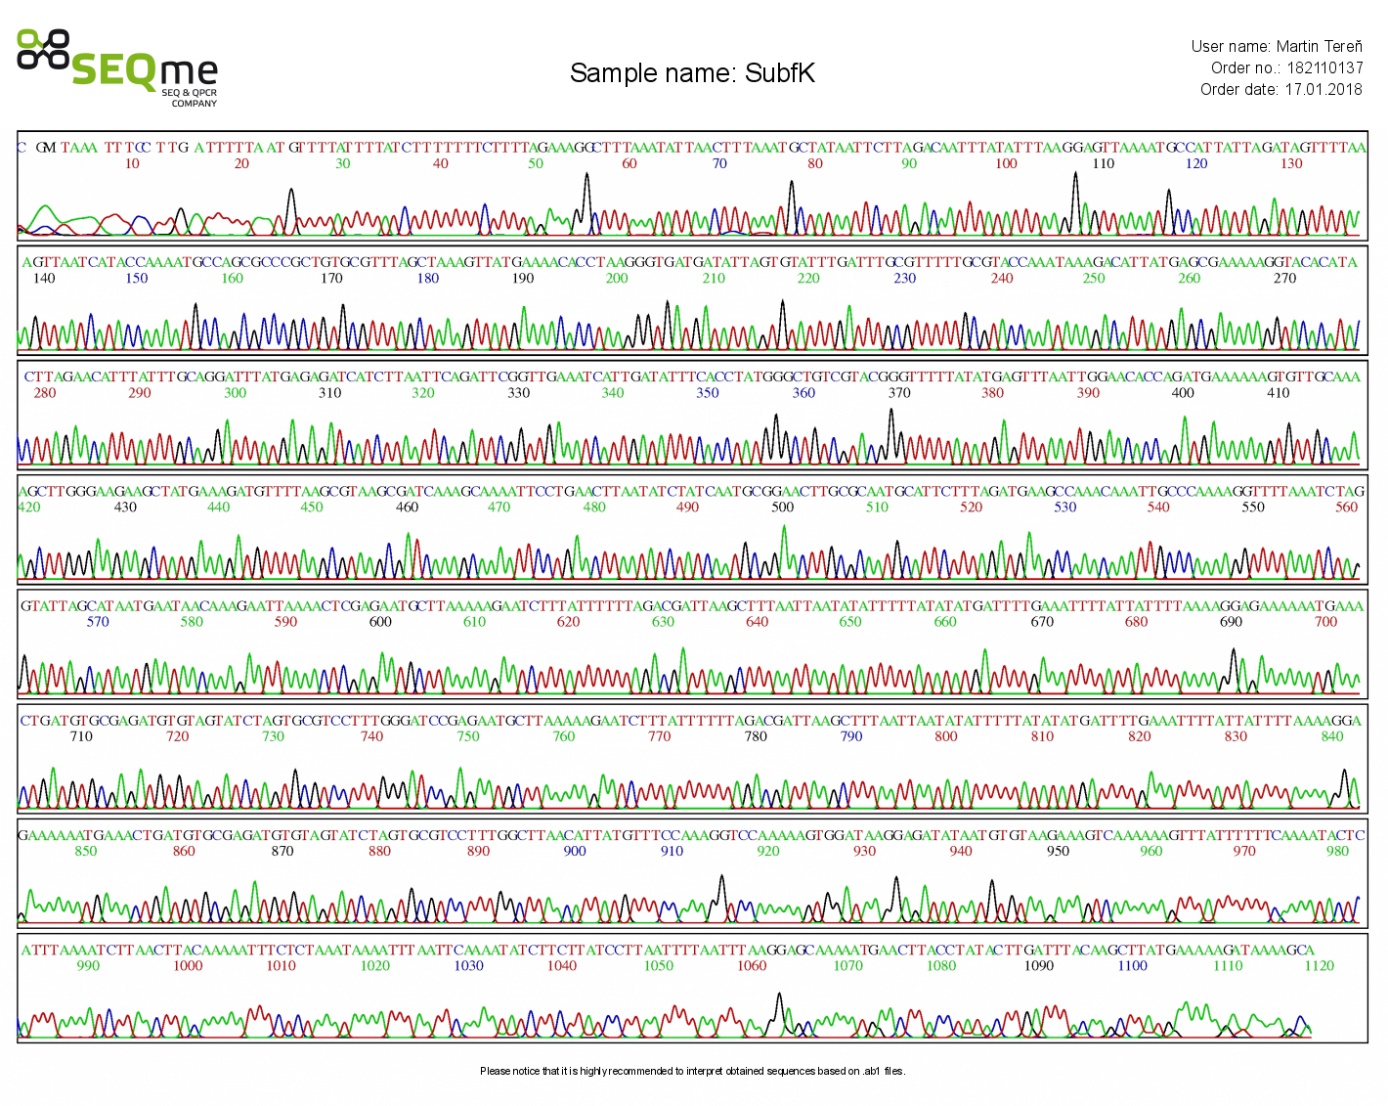
 **Fig. S4e** Results of Sanger sequencing for *luxS* complementation cassette with using of primer SubF; forward.

Fasta:

>CGMTAAATTTCCTTGATTTTTAATGTTTTATTTTATCTTTTTTTCTTTTAGAAAGGCTTTAAATATTAACTTTAAATGCTATAATTCTTAGACAATTTATATTTAAGGAGTTAAAATGCCATTATTAGATAGTTTTAAAGTTAATCATACCAAAATGCCAGCGCCCGCTGTGCGTTTAGCTAAAGTTATGAAAACACCTAAGGGTGATGATATTAGTGTATTTGATTTGCGTTTTTGCGTACCAAATAAAGACATTATGAGCGAAAAAGGTACACATACCTTAGAACATTTATTTGCAGGATTTATGAGAGATCATCTTAATTCAGATTCGGTTGAAATCATTGATATTTCACCTATGGGCTGTCGTACGGGTTTTTATATGAGTTTAATTGGAACACCAGATGAAAAAAGTGTTGCAAAAGCTTGGGAAGAAGCTATGAAAGATGTTTTAAGCGTAAGCGATCAAAGCAAAATTCCTGAACTTAATATCTATCAATGCGGAACTTGCGCAATGCATTCTTTAGATGAAGCCAAACAAATTGCCCAAAAGGTTTTAAATCTAGGTATTAGCATAATGAATAACAAAGAATTAAAACTCGAGAATGCTTAAAAAGAATCTTTATTTTTTAGACGATTAAGCTTTAATTAATATATTTTTATATATGATTTTGAAATTTTATTATTTTAAAAGGAGAAAAAATGAAACTGATGTGCGAGATGTGTAGTATCTAGTGCGTCCTTTG**GGATCC**GAGAATGCTTAAAAAGAATCTTTATTTTTTAGACGATTAAGCTTTAATTAATATATTTTTATATATGATTTTGAAATTTTATTATTTTAAAAGGAGAAAAAATGAAACTGATGTGCGAGATGTGTAGTATCTAGTGCGTCCTTTGGCTTAACATTATGTTTCCAAAGGTCCAAAAAGTGGATAAGGAGATATAATGTGTAAGAAAGTCAAAAAAGTTTATTTTTTCAAAATACTCATTTAAAATCTTAACTTACAAAAATTTCTCTAAATAAAATTTAATTCAAAATATCTTCTTATCCTTAATTTTAATTTAAGGAGCAAAAATGAACTTACCTATACTTGATTTACAAGCTTATGAAAAAGATAAAAGCA

**Transformation of *Campylobacter jejuni* 81-176 by cassette mutagenesis**

**PCR cycle for primer Set 13**

| **Degrees of Celsius (°C)** | **Time (s)** | **Number of cycles** |
| --- | --- | --- |
| 98 | 30 |  |
| 98 | 10 | 30 |
| 63 | 30 |
| 72 | 90 |
| 72 | 60 |  |
| 4 | to open |  |

**PCR cycle for primer Set 14**

| **Degrees of Celsius (°C)** | **Time (s)** | **Number of cycles** |
| --- | --- | --- |
| 98 | 30 |  |
| 98 | 10 | 35 |
| 57 | 30 |
| 72 | 20 |
| 72 | 20 |  |
| 4 | to open |  |
